# Supplementary material for: Increased rate of introduction of non-native plants in China since 2002 driven by intentional introductions
Source: Research Square preprint supplement (doi:10.21203/rs.3.rs-420245/v1), 2021-04-14
Supplement: Supplementary file 1 [file 47944aca939562da8aea01b5.xlsx]

## Sheet: Sheet1
species	family	genera	introduction pathway	introduction time
Euphorbia hirta	Euphorbiaceae	Euphorbia	unintentional	before 1840
Mimosa pudica	Leguminosae	Mimosa	unintentional	before 1840
Solanum erianthum	Solanaceae	Solanum	unintentional	before 1840
Opuntia dillenii	Cactaceae	Opuntia	intentional	before 1840
Psidium guajava	Myrtaceae	Psidium	unintentional	before 1840
Catharanthus roseus	Apocynaceae	Catharanthus	intentional	before 1840
Oenothera rosea	Onagraceae	Oenothera	intentional	before 1840
Oenothera stricta	Onagraceae	Oenothera	intentional	before 1840
Acacia decurrens	Leguminosae	Acacia	intentional	before 1840
Opuntia ficus-indica	Cactaceae	Opuntia	intentional	before 1840
Acacia farnesiana	Leguminosae	Acacia	intentional	before 1840
Hylocereus undatus	Cactaceae	Hylocereus	intentional	before 1840
Ipomoea quamoclit	Convolvulaceae	Ipomoea	intentional	before 1840
Opuntia monacantha	Cactaceae	Opuntia	intentional	before 1840
Portulaca grandiflora	Portulacaceae	Portulaca	intentional	before 1840
Datura stramonium	Solanaceae	Datura	intentional	before 1840
Datura metel	Solanaceae	Datura	intentional	before 1840
Talinum paniculatum	Portulacaceae	Talinum	intentional	before 1840
Chamaecrista mimosoides	Leguminosae	Chamaecrista	intentional	before 1840
Daucus carota	Umbelliferae	Daucus	unintentional	before 1840
Veronica polita	Scrophulariaceae	Veronica	unintentional	before 1840
Hibiscus trionum	Malvaceae	Hibiscus	unintentional	before 1840
Sinapis alba	Cruciferae	Sinapis	intentional	before 1840
Amaranthus tricolor	Amaranthaceae	Amaranthus	intentional	before 1840
Solanum torvum	Solanaceae	Solanum	unintentional	before 1840
Ricinus communis	Euphorbiaceae	Ricinus	intentional	before 1840
Ocimum basilicum	Labitae	Ocimum	intentional	before 1840
Ismelia carinata	Compositae	Glebionis	intentional	before 1840
Coriandrum sativum	Apiaceae	Coriandrum	intentional	before 1840
Lablab purpureus	Fabaceae	Lablab	intentional	before 1840
Amaranthus caudatus	Amaranthaceae	Amaranthus	intentional	before 1840
Ipomoea nil	Convolvulaceae	Ipomoea	intentional	before 1840
Chenopodium ficifolium	Chenopodiaceae	Chenopodium	unintentional	before 1840
Agrostemma githago	Caryophyllaceae	Agrostemma	unintentional	before 1840
Sonchus oleraceus	Compositae	Sonchus	unintentional	before 1840
Melilotus albus	Leguminosae	Melilotus	intentional	before 1840
Melilotus officinalis	Leguminosae	Melilotus	intentional	before 1840
Medicago polymorpha	Leguminosae	Medicago	unintentional	before 1840
Oenothera glazioviana	Onagraceae	Oenothera	intentional	before 1840
Medicago sativa	Leguminosae	Medicago	intentional	before 1840
Vaccaria hispanica	Caryophyllaceae	Vaccaria	intentional	before 1840
Lolium perenne	Poaceae	Lolium	intentional	before 1840
Veronica peregrina	Scrophulariaceae	Veronica	unintentional	before 1840
Cucumis melo	Cucurbitaceae	Cucumis	intentional	before 1840
Ipomoea batatas	Convolvulaceae	Ipomoea	intentional	before 1840
Basella alba	Basellaceae	Basella	intentional	before 1840
Cannabis sativa	Moraceae	Cannabis	intentional	before 1840
Celosia cristata	Amaranthaceae	celosia	intentional	before 1840
Coix lacryma-jobi	Poaceae	Coix	intentional	before 1840
Lycopersicon esculentum	Solanaceae	Lycopersicon	intentional	before 1840
Manihot esculenta	Euphorbiaceae	Manihot	intentional	before 1840
Croton hirtus	Euphorbiaceae	Croton	intentional	2011
Bryophyllum daigremontianum	Crassulaceae	Bryophyllum	unintentional	2011
Salicornia bigelovii	Chenopodiaceae	Salicornia	intentional	2011
Panicum dichotomiflorum	Poaceae	Panicum	intentional	2011
Erigeron speciosus	Compositae	Erigeron	intentional	2011
Thalia dealbata	Marantaceae	Thalia	intentional	2011
Crassocephalum rubens	Compositae	Crassocephalum	intentional	2010
Oxalis latifolia	Oxalidaceae	Oxalis	intentional	2010
Spermacoce remota	Rubiaceae	Spermacoce	intentional	2010
Diplotaxis muralis	Cruciferae	Diplptaxis	unintentional	2010
Tragopogon dubius	Compositae	Tragopogon	intentional	2010
Oxybaphus nyctagineus	Nyctaginaceae	Oxybaphus	intentional	2010
Hippobroma longiflora	Campanulaceae	Hippobroma	intentional	2009
Sorghum almum	Poaceae	Sorghum	intentional	2008
Festuca arundinacea	Poaceae	Festuca	unintentional	2008
Centaurea maculosa	Compositae	Centaurea	intentional	2008
Oxalis triangularis	Oxalidaceae	Oxalis	intentional	2007
Gymnocoronis spilanthoides	Compositae	Gymnocoronis	unintentional	2007
Glebionis segetum	Compositae	Glebionis	intentional	2007
Sporobolus pyramidatus	Poaceae	Sporobolus	intentional	2007
Cenchrus incertus	Poaceae	Cenchrus	unintentional	2007
Dysphania pumilio	Chenopodiaceae	Chenopodium	unintentional	2007
Bryophyllum delagoense	Crassulaceae	Bryophyllum	intentional	2006
Cyperus involucratus	Cyperaceae	Cyperus	intentional	2006
Acacia senegal	Leguminosae	Acacia	intentional	2006
Salvinia adnata	Salviniaceae	Salvina	intentional	2006
Acmella oleracea	Compositae	Acmella	intentional	2006
Stachytarpheta cayennensis	Verbenaceae	Stachytarpheta	unintentional	2006
Eleutheranthera ruderalis	Compositae	Eleutheranthera	unintentional	2006
Erechtites valerianifolia	Compositae	Erechtites	unintentional	2006
Paspalum paniculatum	Poaceae	Paspalum	intentional	2006
Tradescantia pallida	Commelinaceae	Tradescantia	unintentional	2006
Egeria densa	Hydrocharitaceae	Egeria	intentional	2006
Nothoscordum gracile	Liliaceae	Nothoscordum	intentional	2006
Xanthosoma sagittifolium	Araceae	Xanthosoma	unintentional	2006
Rivina humilis	Phytolaccaceae	Rivina	intentional	2006
Cyclachaena xanthiifolia	Compositae	Cyclachaena	unintentional	2006
Pluchea carolinensis	Compositae	Pluchea	unintentional	2006
Laportea aestuans	Urticaceae	Laportea	intentional	2006
Arachis duranensis	Leguminosae	Arachis	intentional	2005
Verbena bracteata	Verbenaceae	Verbena	intentional	2005
Callisia repens	Commelinaceae	Callisia	intentional	2005
Amaranthus standleyanus	Amaranthaceae	Amaranthus	unintentional	2004
Paspalum fimbriatum	Poaceae	Paspalum	intentional	2004
Bidens alba	Compositae	Bidens	unintentional	2004
Talinum fruticosum	Portulacaceae	Talinum	intentional	2004
Pseudelephantopus spicatus	Compositae	Pseudelephantopus	unintentional	2004
Tanacetum parthenifolium	Compositae	Tanacetum	intentional	2004
Euphorbia nutans	Euphorbiaceae	Euphorbia	unintentional	2004
Mimosa bimucronata	Leguminosae	Mimosa	unintentional	2003
Hydrocotyle vulgaris	Umbelliferae	Hydrocotyle	intentional	2003
Smallanthus uvedalia	Compositae	Smallanthus	intentional	2003
Flaveria bidentis	Compositae	Flaveria	intentional	2003
Tagetes minuta	Compositae	Tagetes	intentional	2002
Rudbeckia hirta	Compositae	Rudbeckia	intentional	2002
Ehrharta erecta	Poaceae	Ehrharta	unintentional	2001
Mimosa diplotricha	Leguminosae	Mimosa	intentional	1999
Clidemia hirta	Melastomataceae	Clidemia	intentional	1999
Praxelis clematidea	Compositae	Praxelis	intentional	1998
Pluchea sagittalis	Compositae	Pluchea	intentional	1998
Chenopodium glaucum	Chenopodiaceae	Chenopodium	unintentional	1998
Mimosa pigra	Leguminosae	Mimosa	intentional	1998
Myriophyllum aquaticum	Haloragidaceae	Myriophyllum	unintentional	1996
Cuphea carthagenensis	Lythraceae	Cuphea	intentional	1995
Soliva sessilis	Compositae	Soliva	intentional	1995
Heliotropium ellipticum	Boraginaceae	Heliotropium	unintentional	1995
Ammannia coccinea	Lythraceae	Ammannia	intentional	1995
Panicum acuminatum	Poaceae	Dichanthelium	unintentional	1995
Malvastrum americanum	Malvaceae	Malvastrum	intentional	1995
Sonneratia apetala	SonneratiaÂ	Sonneratia	unintentional	1995
Herissantia crispa	Malvaceae	Herissantia	unintentional	1994
Calyptocarpus vialis	Compositae	Calyptocarpus	unintentional	1993
Paspalum malacophyllum	Poaceae	Paspalum	intentional	1992
Silene latifolia	Caryophyllaceae	Silene	intentional	1991
Althaea officinalis	Malvaceae	Althaea	intentional	1991
Xanthium orientale subsp. italicum	Compositae	Xanthium	unintentional	1991
Oenothera oakesiana	Onagraceae	Oenothera	intentional	1991
Setaria sphacelata	Poaceae	Setaria	unintentional	1990
Sicyos angulatus	Cucurbitaceae	Sicyos	unintentional	1987
Stylosanthes guianensis	Leguminosae	Stylosanthes	unintentional	1986
Myosoton aquaticum	Caryophyllaceae	Myosoton	unintentional	1986
Mitracarpus hirtus	Rubiaceae	Mitracarpus	intentional	1985
Paspalum plicatulum	Poaceae	Paspalum	intentional	1985
Amaranthus palmeri	Amaranthaceae	Amaranthus	unintentional	1985
Ipomoea lacunosa	Convolvulaceae	Ipomoea	unintentional	1983
Phalaris paradoxa	Poaceae	Phalaris	intentional	1982
Solanum sarrachoides	Solanaceae	Solanum	unintentional	1981
Jacquemontia tamnifolia	Convolvulaceae	Jacquemontia	unintentional	1981
Triodanis perfoliata	Campanulaceae	Triodanis	intentional	1981
Brachiaria brizantha	Poaceae	Brachiaria	intentional	1980
Solanum rostratum	Solanaceae	Solanum	intentional	1980
Dinebra retroflexa	Poaceae	Dinebra	unintentional	1979
Spartina alterniflora	Poaceae	Spartina	unintentional	1979
Amaranthus polygonoides	Amaranthaceae	Amaranthus	unintentional	1979
Pennisetum polystachion	Poaceae	Pennisetum	intentional	1978
Azolla filiculoides	Â Azollaceae	Azolla	intentional	1978
Anredera scandens	Basellaceae	Anredera	intentional	1977
Aegilops triuncialis	Poaceae	Aegilops	intentional	1977
Orobanche brassicae	Orobanchaceae	Orobanche	intentional	1977
Lolium remotum	Poaceae	Lolium	unintentional	1976
Euphorbia dentata	Euphorbiaceae	Euphorbia	unintentional	1976
Salsola kali	Chenopodiaceae	Salsola	unintentional	1975
Euphorbia chamaesyce	Euphorbiaceae	Euphorbia	unintentional	1975
Sphagneticola trilobata	Compositae	Sphagneticola	unintentional	1975
Impatiens walleriana	Aizoaceae	Impatiens	intentional	1973
Martynia annua	Martyniaceae	Martynia	unintentional	1972
Macroptilium atropurpureum	Leguminosae	Macroptilium	intentional	1969
Sinapis arvensis	Cruciferae	Sinapis	intentional	1965
Brachiaria mutica	Poaceae	Brachiaria	intentional	1964
Cuscuta campestris	Convolvulaceae	Cuscuta	unintentional	1964
Merremia tuberosa	Convolvulaceae	Merremia	intentional	1964
Centaurea diffusa	Compositae	Centaurea	intentional	1964
Cyperus esculentus	Cyperaceae	Cyperus	intentional	1964
Oxalis bowiei	Oxalidaceae	Oxalis	intentional	1963
Spathodea campanulata	Bignoniaceae	Spathodea	intentional	1963
Neptunia plena	Leguminosae	Neptunia	intentional	1963
Desmanthus virgatus	Leguminosae	Desmanthus	intentional	1963
Lolium persicum	Poaceae	Lolium	intentional	1963
Helenium bigelovii	Compositae	Helenium	intentional	1963
Senna didymobotrya	Leguminosae	Senna	intentional	1961
Aeschynomene americana	Leguminosae	Aeschynomene	intentional	1961
Kalanchoe integra	Crassulaceae	Kalanchoe	intentional	1961
Begonia cucullata	Begoniaceae	Begonia	intentional	1959
Senna corymbosa	Leguminosae	Senna	intentional	1959
Erigeron strigosus	Compositae	Erigeron	unintentional	1959
Cleome rutidosperma	Capparaceae	Cleome	intentional	1958
Richardia brasiliensis	Rubiaceae	Richardia	intentional	1958
Amaranthus cruentus	Amaranthaceae	Amaranthus	intentional	1958
Capsella bursa-pastoris	Cruciferae	Capsella	intentional	1958
Alternanthera pungens	Amaranthaceae	Alternanthera	unintentional	1957
Limnocharis flava	Butomaceae	Limnocharis	intentional	1957
Silybum marianum	Compositae	Silybum	intentional	1957
Solanum carolinense	Solanaceae	Solanum	unintentional	1957
Oenothera villosa	Onagraceae	Oenothera	intentional	1957
Pistia stratiotes	Araceae	Pistia	intentional	1956
Cuscuta approximata	Convolvulaceae	Cuscuta	intentional	1956
Arrhenatherum elatius	Poaceae	Arrhenatherum	intentional	1956
Cyphomandra betacea	Solanaceae	Cyphomandra	intentional	1955
Ipomoea alba	Convolvulaceae	Ipomoea	intentional	1955
Mentha crispata	Labitae	Mentha	intentional	1955
Agave sisalana	Amaryllidaceae	Agave	intentional	1954
Parapholis incurva	Poaceae	Parapholis	intentional	1954
Eragrostis curvula	Poaceae	Eragrostis	intentional	1953
Chloris gayana	Poaceae	Chloris	intentional	1953
Bromus catharticus	Poaceae	Bromus	intentional	1953
Parthenium argentatum	Compositae	Parthenium	unintentional	1953
Paspalum notatum	Poaceae	Paspalum	intentional	1953
Sanchezia nobilis	Acanthaceae	Sanchezia	unintentional	1953
Buchloe dactyloides	Poaceae	Buchloe	intentional	1953
Crotalaria ochroleuca	Leguminosae	Crotalaria	intentional	1952
Crotalaria incana	Leguminosae	Crotalaria	intentional	1952
Sorghum drummondii	Poaceae	Sorghum	unintentional	1951
Passiflora quadrangularis	Passifloraceae	Passiflora	intentional	1951
Cymbalaria muralis	Scrophulariaceae	Cymbalaria	intentional	1951
Oenothera parviflora	Onagraceae	Oenothera	intentional	1951
Diodella teres	Rubiaceae	Diodia	unintentional	1951
Acacia mearnsii	Leguminosae	Acacia	intentional	1951
Melinis repens	Poaceae	Melinis	intentional	1950
Erigeron bonariensis	Compositae	Erigeron	unintentional	1950
Coreopsis basalis	Compositae	Coreopsis	intentional	1950
Eucalyptus exserta	Myrtaceae	Eucalyptus	intentional	1950
Brunfelsia brasiliensis	Solanaceae	Brunfelsia	intentional	1950
Stellaria media	Caryophyllaceae	Stellaria	unintentional	1949
Paspalum urvillei	Poaceae	Paspalum	intentional	1948
Lolium temulentum	Poaceae	Lolium	intentional	1948
Senna obtusifolia	Leguminosae	Senna	intentional	1948
Iris pseudacorus	Iridaceae	Iris	intentional	1947
Acacia dealbata	Leguminosae	Acacia	intentional	1946
Tithonia rotundifolia	Compositae	Tithonia	unintentional	1943
Physalis peruviana	Solanaceae	Physalis	intentional	1943
Senna fruticosa	Leguminosae	Senna	intentional	1943
Xanthium strumarium	Compositae	Xanthium	unintentional	1943
Ipomoea hederifolia	Convolvulaceae	Ipomoea	intentional	1942
Crotalaria trichotoma	Leguminosae	Crotalaria	intentional	1940
Homalocladium platycladum	Polygonaceae	Homalocladium	intentional	1940
Physalis philadelphica	Solanaceae	Physalis	unintentional	1939
Eryngium planum	Umbelliferae	Eryngium	intentional	1939
Derris elliptica	Leguminosae	Paraderris	intentional	1939
Clarkia pulchella	Onagraceae	Clarkia	intentional	1938
Spermacoce alata	Rubiaceae	Spermacoce	unintentional	1937
Crotalaria lanceolata	Leguminosae	Crotalaria	unintentional	1936
Acanthospermum hispidum	Compositae	Acanthospermum	unintentional	1936
Gomphrena celosioides	Amaranthaceae	Gomphrena	intentional	1936
Chromolaena odorata	Compositae	Chromolaena	unintentional	1936
Borago officinalis	Boraginaceae	Borago	intentional	1936
Spartina anglica	Poaceae	Spartina	intentional	1936
Hordeum bulbosum	Poaceae	Hordeum	intentional	1936
Lemna aequinoctialis	Lemnaceae	Lemna	intentional	1936
Silphium perfoliatum	Compositae	Silphium	unintentional	1936
Oenothera tetraptera	Onagraceae	Oenothera	intentional	1935
Ageratina adenophora	Compositae	Ageratina	unintentional	1935
Acacia catechu	Leguminosae	Acacia	intentional	1935
Erigeron philadelphicus	Compositae	Erigeron	unintentional	1935
Ambrosia artemisiifolia	Compositae	Ambrosia	unintentional	1935
Cenchrus echinatus	Poaceae	Cenchrus	unintentional	1934
Senna alata	Leguminosae	Senna	intentional	1934
Senna floribunda	Leguminosae	Senna	intentional	1934
Plantago virginica	Plantaginaceae	Plantago	unintentional	1934
Cucumis bisexualis	Cucurbitaceae	Cucumis	NA	1933
Euphorbia maculata	Euphorbiaceae	Euphorbia	unintentional	1933
Erechtites hieraciifolius	Compositae	Erechtites	unintentional	1933
Crotalaria juncea	Leguminosae	Crotalaria	intentional	1933
Ipomoea mauritiana	Convolvulaceae	Ipomoea	unintentional	1933
Richardia scabra	Leguminosae	Richardia	unintentional	1932
Tradescantia zebrina	Commelinaceae	Tradescantia	intentional	1932
Acacia glauca	Leguminosae	Acacia	intentional	1932
Ipomoea indica	Convolvulaceae	Ipomoea	unintentional	1932
Glebionis coronaria	Compositae	Glebionis	intentional	1932
Phytolacca americana	Phytolaccaceae	Phytolacca	unintentional	1932
Xanthium spinosum	Compositae	Xanthium	unintentional	1931
Ruellia tuberosa	Acanthaceae	Ruellia	intentional	1931
Alternanthera paronychioides	Amaranthaceae	Alternanthera	unintentional	1931
Heliotropium europaeum	Boraginaceae	Heliotropium	unintentional	1931
Atriplex micrantha	Chenopodiaceae	Atriplex	unintentional	1931
Trifolium fragiferum	Leguminosae	Trifolium	unintentional	1931
Cota tinctoria	Compositae	Anthemis	unintentional	1931
Solanum sisymbriifolium	Solanaceae	Solanum	unintentional	1930
Zephyranthes candida	Amaryllidaceae	Zephyranthes	intentional	1930
Euphorbia prostrata	Euphorbiaceae	Euphorbia	unintentional	1930
Desmodium tortuosum	Leguminosae	Desmodium	intentional	1930
Crotalaria micans	Leguminosae	Crotalaria	intentional	1930
Raphanus raphanistrum	Cruciferae	Raphanus	unintentional	1930
Atropa belladonna	Solanaceae	Atropa	intentional	1930
Lepidium perfoliatum	Cruciferae	Lepidium	unintentional	1930
Cuscuta epilinum	Convolvulaceae	Cuscuta	unintentional	1930
Gaura mollis	Onagraceae	Gaura	intentional	1930
Rudbeckia laciniata	Compositae	Rudbeckia	intentional	1930
Euphorbia tirucalli	Euphorbiaceae	Euphorbia	intentional	1929
Solanum diphyllum	Solanaceae	Solanum	unintentional	1929
Erysimum repandum	Cruciferae	Erysimum	unintentional	1929
Amaranthus albus	Amaranthaceae	Alternanthera	unintentional	1929
Solanum elaeagnifolium	Solanaceae	Solanum	unintentional	1929
Hyptis brevipes	Labitae	Hyptis	unintentional	1929
Cymbopogon citratus	Poaceae	Cymbopogon	intentional	1929
Euphorbia cyathophora	Euphorbiaceae	Euphorbia	intentional	1928
Stachytarpheta jamaicensis	Verbenaceae	Stachytarpheta	unintentional	1928
Tridax procumbens	Compositae	Tridax	unintentional	1928
Euphorbia tithymaloides	Euphorbiaceae	Pedilanthus	intentional	1928
Bougainvillea glabra	Nyctaginaceae	Bougainvillea	intentional	1928
Passiflora suberosa	Passifloraceae	Passiflora	intentional	1928
Alyssum alyssoides	Cruciferae	Alyssum	unintentional	1928
Veronica hederifolia	Scrophulariaceae	Veronica	unintentional	1928
Ranunculus arvensis	Ranunculaceae	Ranunculus	intentional	1928
Atriplex canescens	Chenopodiaceae	Atriplex	unintentional	1928
Phyllanthus amarus	Euphorbiaceae	Phyllanthus	intentional	1928
Tephrosia candida	Leguminosae	Tephrosia	unintentional	1928
Ludwigia hyssopifolia	Onagraceae	Ludwigia	unintentional	1927
Zephyranthes carinata	Amaryllidaceae	Zephyranthes	intentional	1927
Senna hirsuta	Leguminosae	Senna	intentional	1927
Passiflora caerulea	Passifloraceae	Passiflora	intentional	1927
Stachys arvensis	Labitae	Stachys	unintentional	1927
Crocosmia crocosmiiflora	Iridaceae	Crocosmia	intentional	1927
Elephantopus tomentosus	Compositae	Elephantopus	intentional	1927
Parthenium hysterophorus	Compositae	Parthenium	intentional	1926
Axonopus compressus	Poaceae	Axonopus	intentional	1926
Anredera cordifolia	Basellaceae	Anredera	intentional	1926
Ammi majus	Umbelliferae	Ammi	intentional	1926
Trifolium incarnatum	Leguminosae	Trifolium	intentional	1926
Secale cereale	Poaceae	Secale	unintentional	1926
Vicia villosa	Leguminosae	Vicia	intentional	1926
Ranunculus muricatus	Ranunculaceae	Ranunculus	unintentional	1926
Symphytum officinale	Boraginaceae	Symphytum	intentional	1926
Armoracia rusticana	Cruciferae	Armoracia	intentional	1926
Amaranthus blitoides	Amaranthaceae	Amaranthus	intentional	1926
Bidens frondosa	Compositae	Bidens	unintentional	1926
Hordeum jubatum	Poaceae	Hordeum	unintentional	1926
Solidago canadensis	Compositae	Solidago	unintentional	1926
Yucca gloriosa	Liliaceae	Yucca	intentional	1926
Calopogonium mucunoides	Leguminosae	Calopogonium	intentional	1925
Centrosema pubescens	Leguminosae	Centrosema	unintentional	1925
Phalaris minor	Poaceae	Phalaris	intentional	1925
Lepidium campestre	Cruciferae	Lepidium	unintentional	1925
Crepis tectorum	Compositae	Crepis	unintentional	1925
Amaranthus hypochondriacus	Amaranthaceae	Amaranthus	intentional	1925
Lepidium densiflorum	Cruciferae	Lepodium	unintentional	1925
Euphorbia serpens	Euphorbiaceae	Euphorbia	intentional	1925
Plantago aristata	Primulaceae	Plantago	intentional	1925
Coreopsis grandiflora	Compositae	Coreopsis	intentional	1925
Rhus typhina	Anacardiaceae	Rhus	intentional	1925
Sesbania grandiflora	Leguminosae	Sesbania	intentional	1925
Crassocephalum crepidioides	Compositae	Crassocephalum	unintentional	1924
Setaria parviflora	Poaceae	Setaria	unintentional	1924
Reseda lutea	Resedaceae	Reseda	unintentional	1924
Securigera varia	Leguminosae	Coronilla	intentional	1924
Pennisetum purpureum	Poaceae	Pennisetum	intentional	1923
Eupatorium cannabinum	Compositae	Eupatorium	unintentional	1923
Senna bicapsularis	Leguminosae	Senna	intentional	1923
Brugmansia suaveolens	Solanaceae	Brugmansia	intentional	1923
Trifolium hybridum	Leguminosae	Trifolium	intentional	1923
Cichorium intybus	Compositae	Cichorium	intentional	1923
Oenothera laciniata	Onagraceae	Oenothera	intentional	1923
Oenothera drummondii	Onagraceae	Oenothera	intentional	1923
Sechium edule	Cucurbitaceae	Sechium	intentional	1923
Abelmoschus esculentus	Malvaceae	Abelmoschus	intentional	1923
Hedychium coronarium	Zingiberaceae	Hedychium	intentional	1923
Hyptis capitata	Labitae	Hyptis	unintentional	1922
Hippeastrum vittatum	Amaryllidaceae	Hippeastrum	intentional	1922
Lantana montevidensis	Verbenaceae	Lantana	intentional	1922
Antigonon leptopus	Â Polygonaceae	Antigonon	intentional	1922
Consolida ajacis	Ranunculaceae	Consolida	intentional	1922
Cosmos sulphureus	Compositae	Cosmos	unintentional	1922
Torenia fournieri	Scrophulariaceae	Torenia	unintentional	1922
Sanvitalia procumbens	Compositae	Sanvitalia	intentional	1921
Tithonia diversifolia	Compositae	Tithonia	intentional	1921
Pyrostegia venusta	Bignoniaceae	Pyrostegia	intentional	1921
Ipomoea triloba	Convolvulaceae	Ipomoea	unintentional	1921
Passiflora edulis	Passifloraceae	Passiflora	intentional	1921
Senecio vulgaris	Compositae	Senecio	intentional	1921
Aster subulatus	Compositae	Aster	unintentional	1921
Euphorbia heterophylla	Euphorbiaceae	Euphorbia	intentional	1921
Acacia auriculiformis	Leguminosae	Acacia	intentional	1921
Cymbopogon nardus	Poaceae	Cymbopogon	unintentional	1921
Linum usitatissimum	Linaceae	Linum	intentional	1920
Anthemis arvensis	Compositae	Anthemis	unintentional	1920
Corchorus olitorius	TiliaÂ	Corchorus	intentional	1920
Chrysopogon zizanioides	Poaceae	Chrysopogon	intentional	1920
Ocimum gratissimum	Labitae	Ocimum	intentional	1919
Nicandra physalodes	Solanaceae	Nicandra	unintentional	1919
Portulaca pilosa	Portulacaceae	Portulaca	intentional	1919
Mikania micrantha	Compositae	Mikania	intentional	1919
Gaillardia pulchella	Compositae	Gaillardia	intentional	1919
Tagetes erecta	Compositae	Tagetes	intentional	1919
Zinnia peruviana	Compositae	Zinnia	intentional	1919
Cosmos bipinnatus	Compositae	Cosmos	intentional	1919
Amorpha fruticosa	Leguminosae	Amorpha	intentional	1919
Acer negundo	Aceraceae	Acer	intentional	1919
Euphorbia pulcherrima	Euphorbiaceae	Euphorbia	intentional	1919
Andrographis paniculata	Bignoniaceae	Androgra	intentional	1919
Bryophyllum pinnatum	Crassulaceae	Bryophyllum	intentional	1918
Amaranthus blitum	Amaranthaceae	Alternanthera	unintentional	1918
Leucaena leucocephala	Leguminosae	Leucaena	unintentional	1918
Geranium carolinianum	Geraniaceae	Geranium	unintentional	1918
Amaranthus hybridus	Amaranthaceae	Amaranthus	intentional	1918
Tetragonia tetragonioides	Aizoaceae	Tretragonia	intentional	1918
Rotala mexicana	Lythraceae	Rotala	intentional	1918
Melilotus indicus	Leguminosae	Melilotus	intentional	1918
Sesbania sesban	Leguminosae	Sesbania	intentional	1918
Albizia lebbeck	Leguminosae	Albizia	intentional	1917
Solanum mammosum	Solanaceae	Solanum	unintentional	1917
Pilea microphylla	Â Urticaceae	Pilea	intentional	1917
Alternanthera bettzickiana	Amaranthaceae	Alternanthera	intentional	1917
Canna indica	Cannaceae	Canna	intentional	1917
Solanum pseudocapsicum	Solanaceae	Solanum	intentional	1917
Cestrum nocturnum	Solanaceae	Cestrum	intentional	1917
Lantana camara	Verbenaceae	Lantana	intentional	1917
Erythrina corallodendron	Leguminosae	Erythrina	intentional	1917
Caesalpinia pulcherrima	Leguminosae	Caesalpinia	intentional	1917
Papaver rhoeas	Papaveraceae	Papaver	unintentional	1917
Avena fatua	Poaceae	Avena	unintentional	1917
Tagetes patula	Compositae	Tagetes	intentional	1917
Cabomba caroliniana	Nymphaeaceae	Cabomba	intentional	1917
Chenopodium giganteum	Chenopodiaceae	Chenopodium	unintentional	1917
Senna surattensis	Leguminosae	Senna	intentional	1917
Euphorbia antiquorum	Euphorbiaceae	Euphorbia	intentional	1917
Clitoria ternatea	Leguminosae	Clitoria	intentional	1917
Piper betle	Piperaceae	Piper	unintentional	1917
Setaria palmifolia	Poaceae	Setaria	intentional	1916
Peperomia pellucida	Piperaceae	Peperomia	intentional	1916
Panicum repens	Poaceae	Panicum	intentional	1916
Bougainvillea spectabilis	Nyctaginaceae	Bougainvillea	intentional	1916
Mentha spicata	Labitae	Mentha	intentional	1916
Galinsoga quadriradiata	Compositae	Galinsoga	unintentional	1915
Zinnia elegans	Compositae	Zinnia	intentional	1915
Paspalum virgatum	Poaceae	Paspalum	intentional	1915
Lolium multiflorum	Poaceae	Lolium	intentional	1915
Gaillardia aristata	Compositae	Gaillardia	unintentional	1915
Bidens pilosa	Compositae	Bidens	unintentional	1915
Eucalyptus globulus	Myrtaceae	Eucalyptus	intentional	1915
Impatiens balsamina	Balsaminaceae	Impatiens	intentional	1915
Justicia gendarussa	Acanthaceae	Justicia	intentional	1915
Chloris virgata	Poaceae	Chloris	unintentional	1914
Phyllanthus niruri	Euphorbiaceae	Phyllanthus	unintentional	1914
Galinsoga parviflora	Compositae	Galinsoga	unintentional	1914
Salvia splendens	Labitae	Salvia	intentional	1914
Poa compressa	Poaceae	Poa	intentional	1914
Phaseolus coccineus	Fabaceae	Phaseolus	intentional	1914
Senna sophera	Leguminosae	Senna	intentional	1914
Petunia hybrida	Solanaceae	Petunia	intentional	1913
Argemone mexicana	Papaveraceae	Argemone	intentional	1913
Macroptilium lathyroides	Leguminosae	Macroptilium	intentional	1913
Fuchsia hybrida	Onagraceae	Fuchsia	intentional	1913
Trifolium pratense	Leguminosae	Trifolium	intentional	1913
Ipomoea cairica	Convolvulaceae	Ipomoea	unintentional	1913
Synedrella nodiflora	Compositae	Synedrella	intentional	1912
Ranunculus sardous	Ranunculaceae	Ranunculus	unintentional	1912
Saponaria officinalis	Caryophyllaceae	Saponaria	intentional	1912
Paspalum conjugatum	Poaceae	Paspalum	intentional	1912
Soliva anthemifolia	Compositae	Soliva	intentional	1912
Vigna umbellata	Fabaceae	Vigna	intentional	1912
Sorghum halepense	Poaceae	Sorghum	unintentional	1911
Syzygium jambos	Myrtaceae	Syzygium	intentional	1911
Crotalaria pallida	Leguminosae	Crotalaria	intentional	1910
Lactuca sativa	Asteraceae	Lactuca	intentional	1910
Foeniculum vulgare	Apiaceae	Foeniculum	intentional	1910
Physalis angulata	Solanaceae	Physalis	unintentional	1910
Indigofera suffruticosa	Leguminosae	Indigofera	intentional	1910
Duranta erecta	Verbenaceae	Duranta	intentional	1910
Veronica arvensis	Scrophulariaceae	Veronica	intentional	1910
Cardamine flexuosa	Cruciferae	Cardamine	unintentional	1910
Cyanus segetum	Compositae	Centaurea	intentional	1910
Plantago lanceolata	Primulaceae	Plantago	unintentional	1910
Leucanthemum vulgare	Compositae	Leucanthemum	intentional	1910
Lepidium virginicum	Cruciferae	Lepidium	unintentional	1910
Gaura lindheimeri	Onagraceae	Gaura	unintentional	1910
Phaseolus vulgaris	Fabaceae	Phaseolus	intentional	1910
Sesbania cannabina	Leguminosae	Sesbania	unintentional	1910
Cajanus cajan	Leguminosae	Cajanus	intentional	1910
Acacia confusa	Leguminosae	Acacia	intentional	1910
Rumex acetosella	Polygonaceae	Rumex	unintentional	1909
Taraxacum campylodes	Compositae	Taraxacum	intentional	1909
Ambrosia trifida	Compositae	Ambrosia	unintentional	1909
Helenium autumnale	Compositae	Helenium	intentional	1909
Coreopsis lanceolata	Compositae	Coreopsis	intentional	1909
Celosia argentea	Amaranthaceae	celosia	intentional	1909
Panicum maximum	Poaceae	Panicum	intentional	1908
Thunbergia alata	Acanthaceae	Thunbergia	intentional	1908
Cerastium glomeratum	Caryophyllaceae	Cerastium	unintentional	1908
Nasturtium officinale	Cruciferae	Nasturtium	intentional	1908
Phleum pratense	Poaceae	Phleum	intentional	1908
Trifolium repens	Leguminosae	Trifolium	intentional	1908
Ageratum houstonianum	Compositae	Ageratum	intentional	1908
Physalis minima	Solanaceae	Physalis	unintentional	1908
Euphorbia hypericifolia	Euphorbiaceae	Euphorbia	intentional	1907
Ageratum conyzoides	Compositae	Ageratum	intentional	1907
Lepidium didymum	Cruciferae	Coronopus	unintentional	1907
Justicia adhatoda	Acanthaceae	Justicia	intentional	1907
Euphorbia marginata	Euphorbiaceae	Euphorbia	intentional	1907
Pachyrhizus erosus	Fabaceae	Pachyrhizus	intentional	1907
Pennisetum clandestinum	Poaceae	Pennisetum	intentional	1906
Dahlia pinnata	Asteraceae	Dahlia	intentional	1906
Veronica persica	Scrophulariaceae	Veronica	intentional	1906
Eclipta prostrata	Compositae	Eclipta	unintentional	1906
Brassica juncea	Brassicaceae	Brassica	intentional	1905
Fagopyrum esculentum	Polygonaceae	Fagopyrum	intentional	1905
Gomphrena globosa	Amaranthaceae	Gomphrena	intentional	1905
Datura innoxia	Solanaceae	Datura	unintentional	1905
Abutilon theophrasti	Malvaceae	Abutilon	intentional	1905
Bidens bipinnata	Compositae	Bidens	unintentional	1904
Sida acuta	Malvaceae	Sida	unintentional	1904
Spergula arvensis	Caryophyllaceae	Spergula	intentional	1903
Digitalis purpurea	Scrophulariaceae	Digitalis	intentional	1903
Helianthus tuberosus	Compositae	Helianthus	intentional	1903
Eichhornia crassipes	Pontederiaceae	Eichhornia	intentional	1901
Pereskia aculeata	Cactaceae	Pereskia	unintentional	1901
Capsicum annuum	Solanaceae	Capsicum	intentional	1901
Jatropha curcas	Euphorbiaceae	Jatropha	intentional	1901
Coreopsis tinctoria	Compositae	Coreopsis	intentional	1901
Tamarindus indica	Leguminosae	Tamarindus	intentional	1900
Cyclospermum leptophyllum	Umbelliferae	Cyclospermum	unintentional	1900
Agave americana	Amaryllidaceae	Agave	intentional	1900
Oenothera biennis	Onagraceae	Oenothera	intentional	1900
Parthenocissus quinquefolia	Vitaceae	Parthenocissus	unintentional	1900
Eryngium foetidum	Umbelliferae	Eryngium	unintentional	1897
Casuarina equisetifolia	Casuarinaceae	Casuarina	intentional	1897
Cyperus rotundus	Cyperaceae	Cyperus	unintentional	1897
Asclepias curassavica	Asclepiadaceae	Asclepias	intentional	1896
Solanum capsicoides	Solanaceae	Solanum	unintentional	1895
Alternanthera philoxeroides	Amaranthaceae	Alternanthera	intentional	1892
Hyptis suaveolens	Labitae	Hyptis	unintentional	1890
Solanum aculeatissimum	Solanaceae	Solanum	unintentional	1890
Ipomoea purpurea	Convolvulaceae	Ipomoea	intentional	1890
Eucalyptus robusta	Myrtaceae	Eucalyptus	intentional	1890
Mangifera indica	Anacardiaceae	Mangifera	intentional	1887
Erigeron annuus	Compositae	Erigeron	unintentional	1886
Euphorbia peplus	Euphorbiaceae	Euphorbia	unintentional	1885
Momordica charantia	Cucurbitaceae	Momordica	intentional	1884
Robinia pseudoacacia	Leguminosae	Robinia	intentional	1877
Senna occidentalis	Leguminosae	Senna	intentional	1876
Amaranthus viridis	Amaranthaceae	Amaranthus	unintentional	1864
Dysphania ambrosioides	Chenopodiaceae	Dysphania	unintentional	1864
Chenopodium hybridum	Chenopodiaceae	Chenopodium	unintentional	1864
Ulex europaeus	Leguminosae	Ulex	unintentional	1862
Waltheria indica	Sterculiaceae	Waltheria	unintentional	1861
Passiflora foetida	Passifloraceae	Passiflora	intentional	1861
Malvastrum coromandelianum	Malvaceae	Malvastrum	intentional	1861
Erigeron canadensis	Compositae	Erigeron	unintentional	1860
Dalbergia sissoo	Fabaceae	Dalbergia	intentional	1858
Amaranthus roxburghianus	Amaranthaceae	Amaranthus	unintentional	1857
Paspalum dilatatum	Poaceae	Paspalum	unintentional	1857
Salvia coccinea	Labitae	Salvia	unintentional	1851
Scoparia dulcis	Scrophulariaceae	Scoparia	intentional	1850
Oxalis debilis	Oxalidaceae	Oxalis	intentional	1850
Erigeron sumatrensis	Compositae	Erigeron	unintentional	1850
Amaranthus retroflexus	Amaranthaceae	Amaranthus	intentional	1850
Mirabilis jalapa	Nyctaginaceae	Miralilis	intentional	1848
Sonchus asper	Compositae	Sonchus	intentional	1848
Macfadyena unguis-cati	Bignoniaceae	Macfadyena	unintentional	1840
